# Supplementary material for: Optimizing Semantic Pointer Representations for Symbol-Like Processing in Spiking Neural Networks
Source: PLOS journal article supplement (doi:10.1371/journal.pone.0149928), 2016-02-22
Supplement: S4 (10.1371/journal.pone.0149928.s004) [file journal.pone.0149928.s004]

## S4 Appendix

**Scaling of number of neurons with dimensions.** The number of neurons in a single NEF ensemble has to be scaled with  $D^2$  where  $D$  is the number of dimensions to keep the absolute error from noise constant. In contrast, if each vector component is represented in a single ensemble the number of neurons has only be scaled linearly with  $D$  if the ensemble radii are set proportional to  $1/\sqrt{D}$  which corresponds to the Nengo default scaling of  $3.5/\sqrt{D}$ . To show this, we ran simulations with both approaches for different dimensionalities with a total of  $20D$  and  $20D^2$  neurons. The input value to the ensembles was a null vector and mean absolute squared distance of the decoded vector was recorded for one second of simulated time. For each choice of  $D$  a total of 20 trials was performed. The results are shown in Fig 1 and confirm the initial statement.

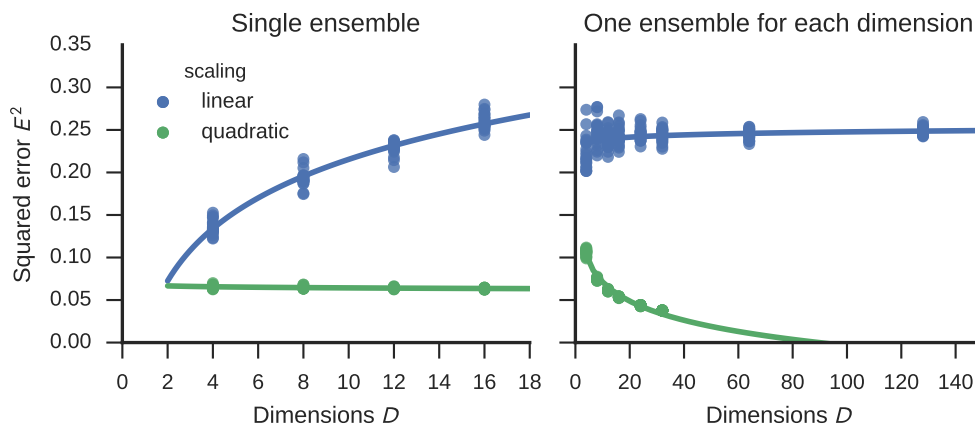

Figure 1: **Squared error in dependence of vector dimensionality and scaling of neuron number.** In the left panel the vector was represented in a single ensemble; in the right panel each vector component was represented in a separate ensemble with the radius set to the Nengo default of  $3.5/\sqrt{D}$ . Each point is the mean error in one trial run. The curves are linear regressions of the form  $E^2 \sim \log(D)$ . Note that the two plots use a different  $x$ -scale as single ensemble simulations are costly for a large number of dimensions.
